# Supplementary material for: Selective C–F/C–H bond activation of fluoroarenes by cobalt complex supported with phosphine ligands
Source: Royal Society of Chemistry journal article supplement (doi:10.1039/c3dt33074e), 2013-01-01
Supplement: c3dt33074e.pdf [file c3dt33074e.pdf]

## Supporting Information for:

### **Selective C-F / C-H Bond Activation of Fluoroarenes by Cobalt Complex supported with phosphine ligands**

Junye Li,<sup>a</sup> Tingting Zheng,<sup>a,b</sup> Hongjian Sun,<sup>a</sup> Wengang Xu,<sup>a</sup> Xiaoyan Li<sup>a</sup> \*

<sup>a</sup> School of Chemistry and Chemical Engineering, Shandong University, Shanda Nanlu 27, 250100 Jinan, People's Republic of China

<sup>b</sup> Department of Chemistry, Capital Normal University, 100037 Beijing, People's Republic of China

## Contents

|                                                                       |          |
|-----------------------------------------------------------------------|----------|
| <b>Fig. 1 The <i>in situ</i> IR of intermediate 9</b>                 | <b>2</b> |
| <b>Fig. 2 The <i>in situ</i> <sup>1</sup>H NMR of intermediate 9</b>  | <b>2</b> |
| <b>Fig. 3 The <i>in situ</i> <sup>19</sup>F NMR of intermediate 9</b> | <b>3</b> |
| <b>Fig. 4 The IR of complex 7</b>                                     | <b>3</b> |
| <b>Fig. 5 The IR of complex 8</b>                                     | <b>4</b> |
| <b>Fig. 6 The IR of complex 11</b>                                    | <b>4</b> |

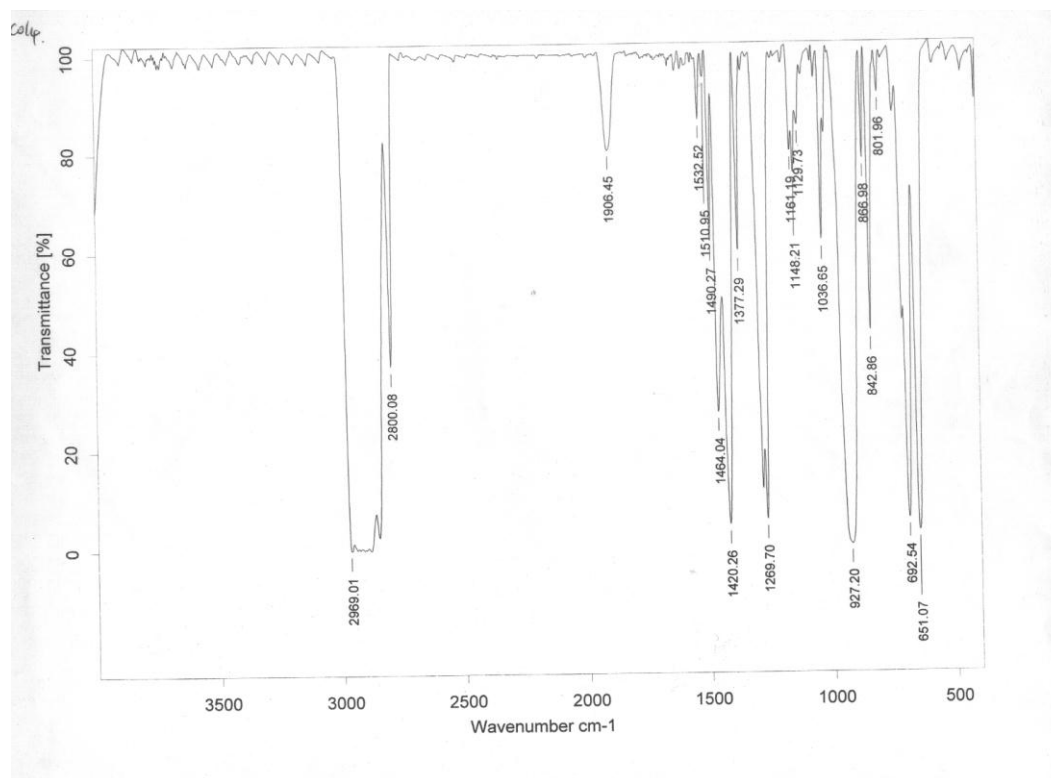

Fig. 1 The *in situ* IR of intermediate 9

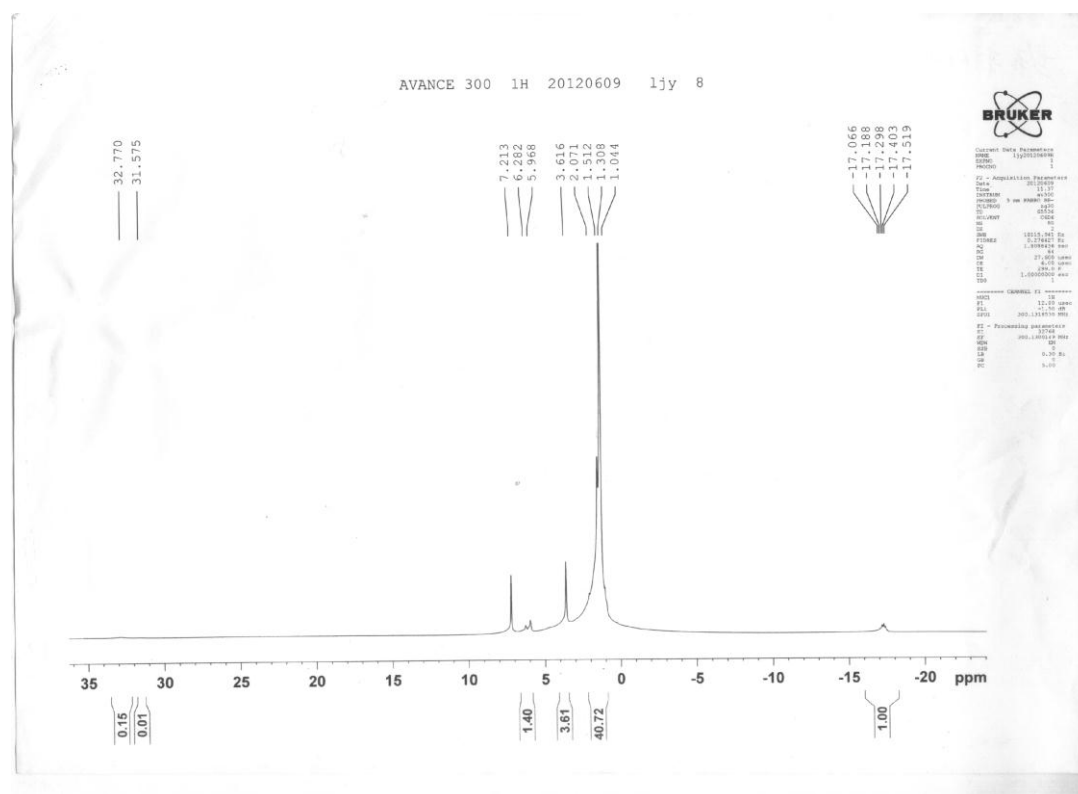

Fig. 2 The *in situ* <sup>1</sup>H NMR of intermediate 9

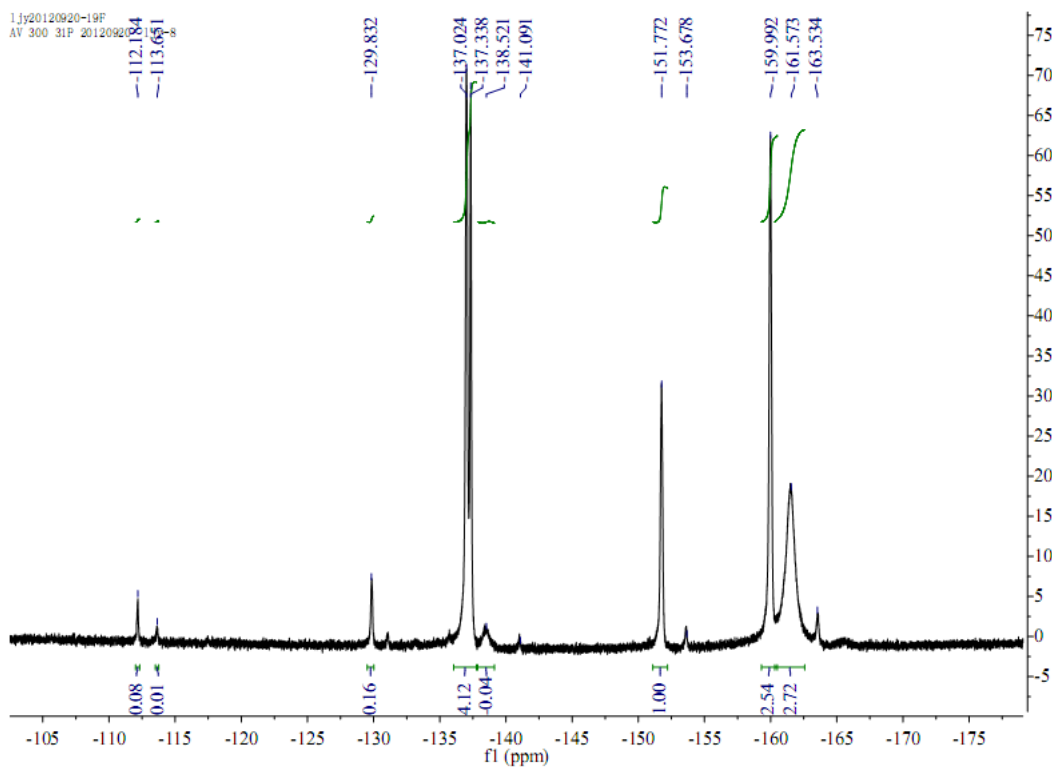

Fig. 3 The *in situ*  $^{19}\text{F}$  NMR of intermediate 9

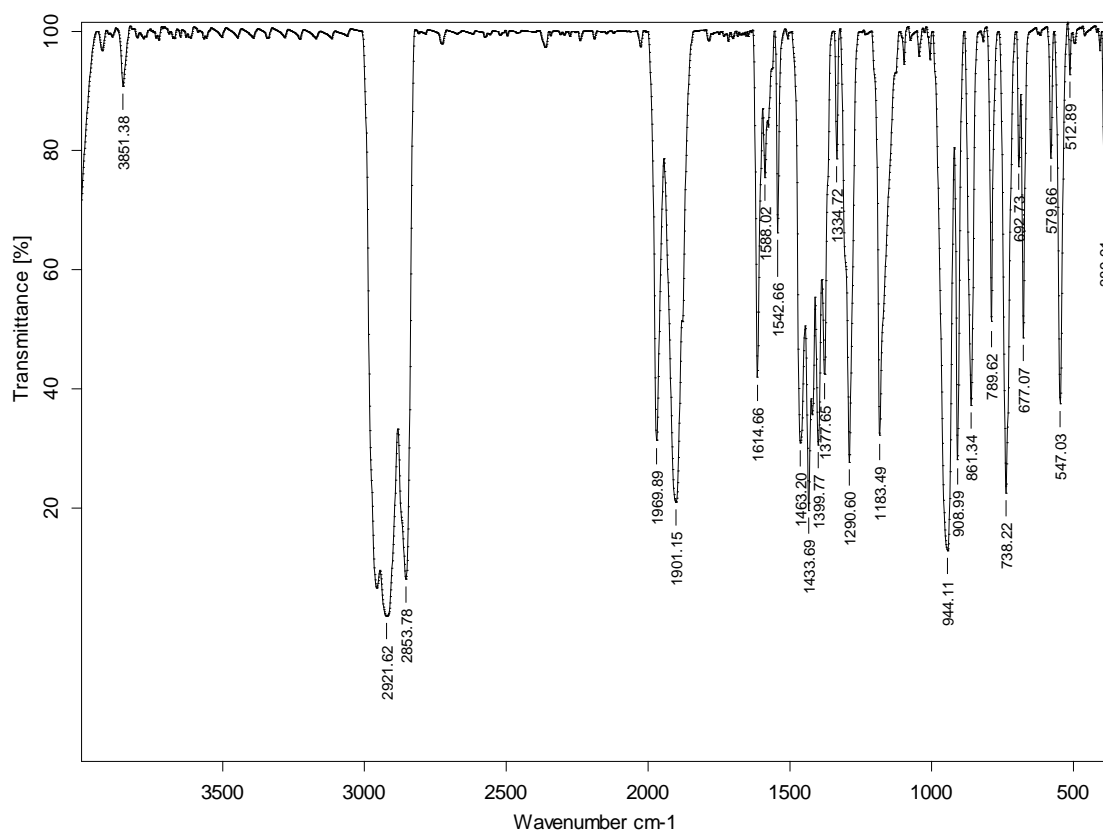

Fig. 4 The IR of complex 7

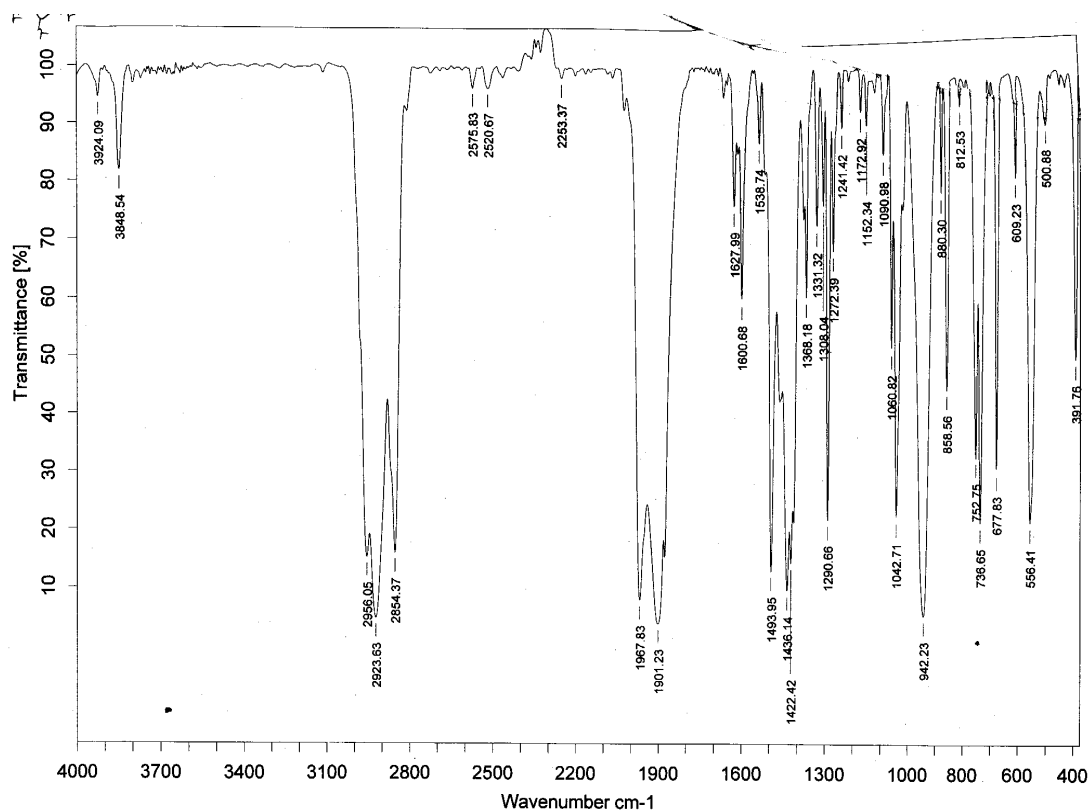

Fig. 5 The IR of complex 8

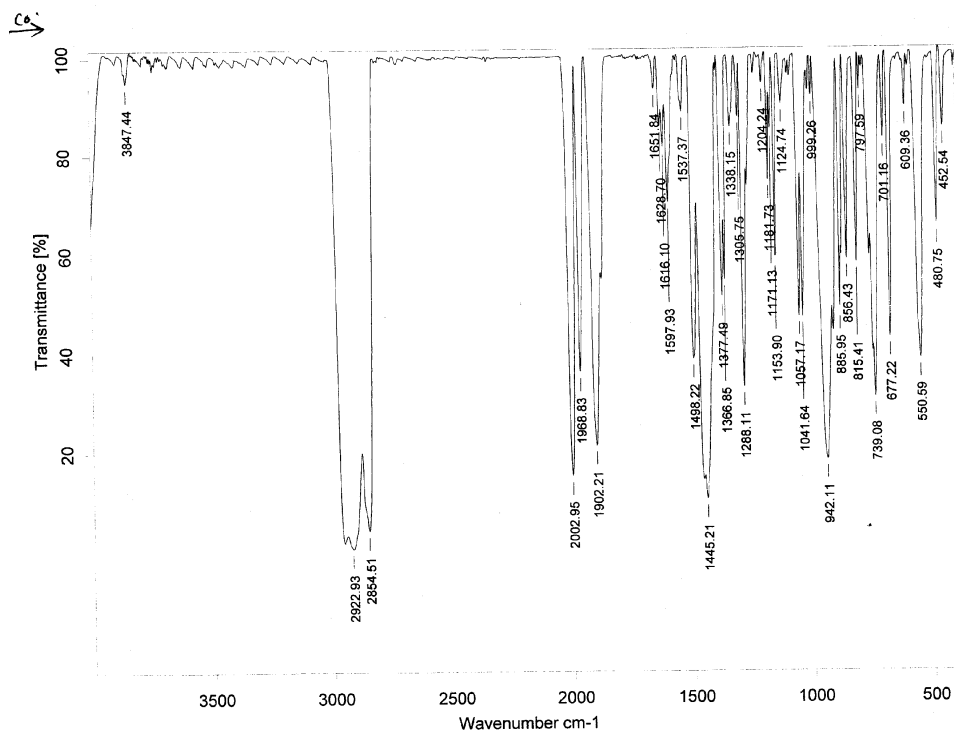

Fig. 6 The IR of complex 11
